# Supplementary material for: Carbon dot aggregates as an alternative to gold nanoparticles for the laser-induced opening of microchamber arrays
Source: Royal Society of Chemistry journal article supplement (doi:10.1039/c8sm01714j), 2018-01-01
Supplement: c8sm01714j1.pdf [file c8sm01714j1.pdf]

## SUPPORTING INFORMATION

### Soft Matter

#### Carbon Dot Aggregates as an Alternative to Gold Nanoparticles for the Laser-induced Opening of Microchamber Arrays

Olga A. Sindeeva,<sup>a,b,\*</sup> Ekaterina S. Prikhozhdenko,<sup>a</sup> Daniil N. Bratashov,<sup>a</sup> Anna M. Vostrikova,<sup>a</sup> Vsevolod S. Atkin,<sup>a</sup> Aleksey V. Ermakov,<sup>a</sup> Boris N. Khlebtsov,<sup>a,c</sup> Andrei V. Sapelkin,<sup>a,b</sup> Irina Yu. Goryacheva<sup>a</sup> and Gleb B. Sukhorukov<sup>a,b,\*</sup>

<sup>a</sup> *Saratov State University, Saratov, 410012 Russia*

<sup>b</sup> *School of Engineering and Materials Science, Queen Mary University of London, Mile End Road, London, E1 4NS, U.K.*

<sup>c</sup> *Institute of biochemistry and physiology of plants and microorganisms RAS, Saratov, 410049, Russia*

\* [o.a.sindeeva@gmail.com](mailto:o.a.sindeeva@gmail.com)

\* [g.sukhorukov@qmul.ac.uk](mailto:g.sukhorukov@qmul.ac.uk)

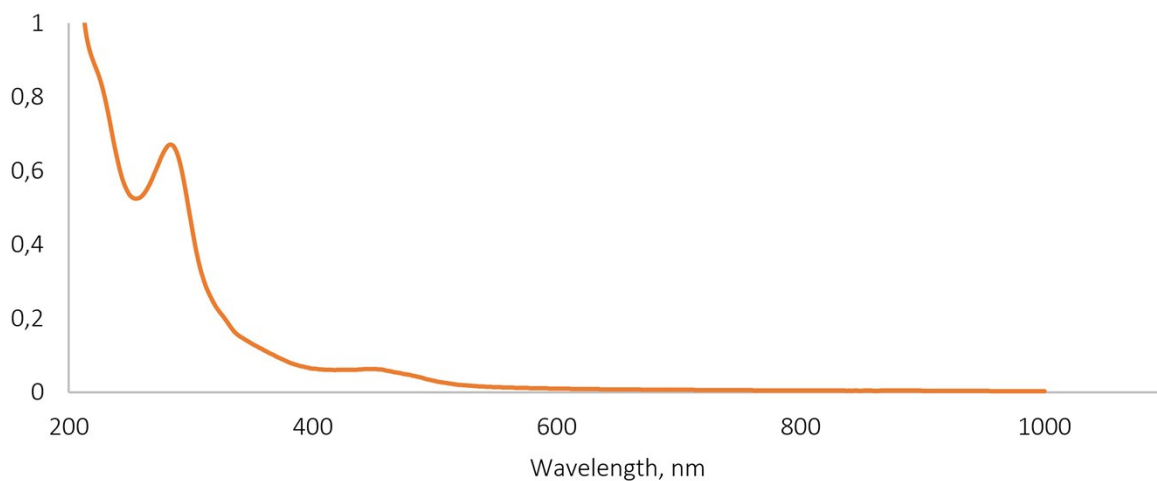

Figure S1. The absorption spectrum of CDs which were synthesized directly from DSS using hydrothermal synthesis in bidistilled water
